# Supplementary material for: Filament Depolymerization Can Explain Chromosome Pulling during Bacterial Mitosis
Source: PubMed Central journal article supplement (PMC3178632; doi:10.1371/journal.pcbi.1002145), 2011-09-22

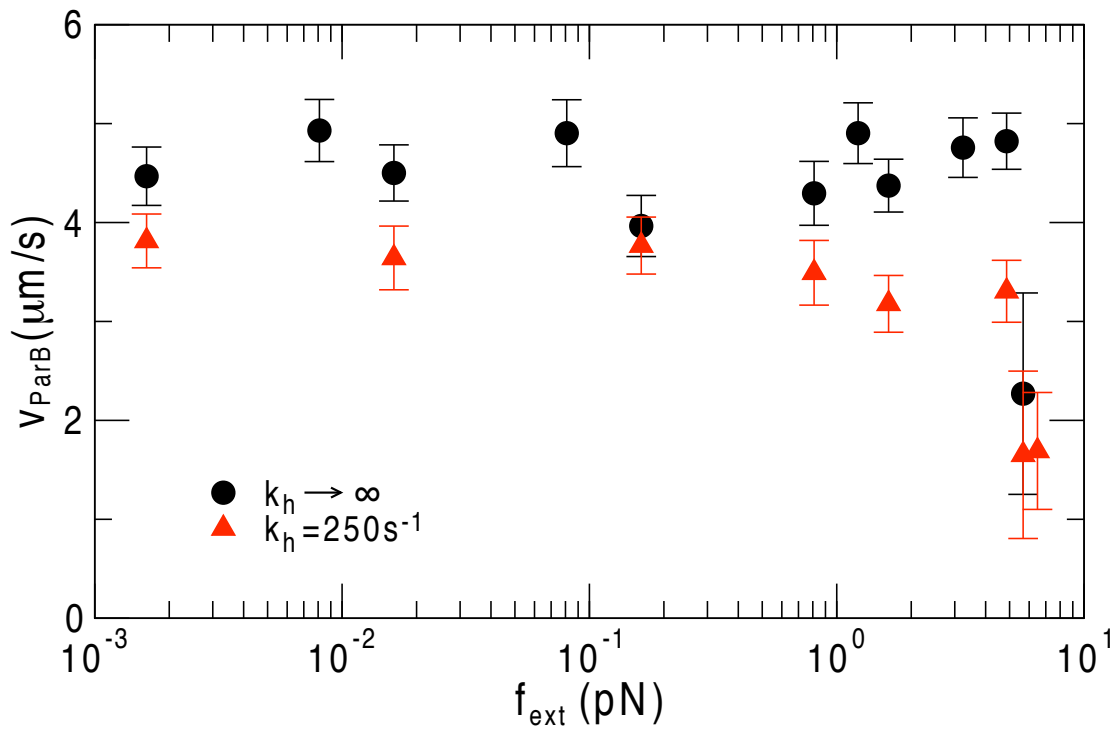

Supplement: pcbi.1002145.s005.pdf [file pcbi.1002145.s005.pdf]
